# Supplementary material for: Endothelial Biomarkers Are Associated With Indirect Lung Injury in Sepsis-Associated Pediatric Acute Respiratory Distress Syndrome
Source: PubMed Central journal article supplement — Crit Care Explor. 2020 Dec 4;2(12):e0295. doi: 10.1097/CCE.0000000000000295 (PMC7721219; doi:10.1097/cce.0000000000000295), 2020-12-04
Supplement: cc9-2-e0295-s003.pdf [file cc9-2-e0295-s003.pdf]

**Supplemental Table 1. Biomarker Concentration by ARDS Subtype**

| <b>Biomarker</b>       | <b>Indirect ARDS (n=46)</b> | <b>Direct ARDS (n=52)</b> | <b>P-value<sup>a</sup></b> |
|------------------------|-----------------------------|---------------------------|----------------------------|
| Ang-1 (ng/mL)          | 2.2 (1.3 – 3.4)             | 3.2 (1.9 – 4.5)           | 0.02 <sup>a</sup>          |
| Ang-2 (ng/mL)          | 16.6 (9.7 – 23.9)           | 6.9 (3.2 – 12.1)          | <0.0001 <sup>a</sup>       |
| Ang-2/Ang-1 ratio      | 6.8 (4.7 – 10.3)            | 2.6 (1.2 – 4.1)           | <0.0001 <sup>a</sup>       |
| Tie-2 (ng/mL)          | 1.7 (1.1 – 5.7)             | 1.9 (1.3 – 9.6)           | 0.5                        |
| E-selectin (ng/mL)     | 62.8 (31.0 – 141.5)         | 81.7 (54.4 – 146.5)       | 0.1                        |
| VEGF (pg/mL)           | 10.0 (6.0 – 36.8)           | 4.9 (2.3 – 12.7)          | 0.0002 <sup>a</sup>        |
| sFLT (ng/mL)           | 2.8 (2.0 - 5.5)             | 2.3 (1.6 – 3.1)           | 0.02 <sup>a</sup>          |
| VEGF-R2 (ng/mL)        | 12.6 (9.0 – 17.9)           | 14.0 (10.9 – 20.7)        | 0.06                       |
| VEGF-R3 (ng/mL)        | 3.8 (2.8 – 4.5)             | 3.7 (2.9 – 5.3)           | 0.8                        |
| ICAM (ng/mL)           | 811.0 (620.2 – 1084.1)      | 704.9 (548.8 – 837.5)     | 0.03 <sup>a</sup>          |
| VCAM (µg/mL)           | 4.2 (2.1 – 6.2)             | 2.0 (1.0 – 2.8)           | <0.0001 <sup>a</sup>       |
| vWF (pg/mL)            | 298.7 (205.4 – 378.3)       | 231.0 (184.0 – 307.8)     | 0.03 <sup>a</sup>          |
| Thrombomodulin (ng/mL) | 6.5 (4.8 – 10.0)            | 4.7 (3.4 – 6.3)           | 0.001 <sup>a</sup>         |
| Endocan (ng/mL)        | 3.3 (2.1 – 7.2)             | 1.7 (1.0 – 3.4)           | 0.001 <sup>a</sup>         |
| CRP (mg/dL)            | 7.0 (1.8 – 12.8)            | 4.7 (1.2 – 11.2)          | 0.3                        |
| IL-6 (pg/mL)           | 215.8 (69.8 – 1937.2)       | 54.2 (15.3 – 175.0)       | 0.0001 <sup>a</sup>        |
| IL-8 (pg/mL)           | 404.3 (70.9 – 2028.8)       | 54.7 (25.6 – 235.5)       | <0.0001 <sup>a</sup>       |
| IL-10 (pg/mL)          | 52.9 (14.7 – 315.0)         | 10.0 (4.8 – 18.7)         | <0.0001 <sup>a</sup>       |
| IL-17 (pg/mL)          | 6.5 (3.7 – 8.9)             | 3.2 (1.6 – 6.6)           | 0.008 <sup>a</sup>         |
| IL-18 (pg/mL)          | 604.4 (274.2 – 1172.6)      | 354.7 (245.2 – 647.6)     | 0.02 <sup>a</sup>          |
| IL-22 (pg/mL)          | 139.3 (104.2 – 196.6)       | 116.5 (93.9 – 161.0)      | 0.09                       |
| CD-14 (ng/mL)          | 2554.4 (1825.2 – 3261.8)    | 2773.4 (1989.2 – 3682.0)  | 0.2                        |
| CD-30 (pg/mL)          | 188.7 (146.8 – 252.9)       | 199.6 (147.6 – 297.0)     | 0.5                        |
| CD-163 (ng/mL)         | 711.6 (425.3 – 1278.9)      | 419.5 (244.5 – 633.5)     | 0.0006 <sup>a</sup>        |
| EGF (pg/mL)            | 40.6 (28.3 – 53.5)          | 37.9 (27.2 – 49.1)        | 0.6                        |
| EGF-R (ng/mL)          | 42.0 (30.6 – 59.5)          | 45.1 (35.3 – 56.4)        | 0.5                        |
| Eotaxin (pg/mL)        | 44.4 (26.7 – 79.9)          | 30.9 (15.2 – 48.2)        | 0.0045 <sup>a</sup>        |
| FGF-Basic (pg/mL)      | 35.4 (22.3 – 47.9)          | 36.9 (26.2 – 46.7)        | 0.98                       |
| GCSF (pg/mL)           | 143.8 (106.0 – 2479.7)      | 117.0 (72.2 – 175.6)      | 0.02 <sup>a</sup>          |
| GMCSF (pg/mL)          | 1.6 (0.7 – 6.6)             | 0.63 (0.40 – 0.90)        | 0.0003 <sup>a</sup>        |
| HGF (pg/mL)            | 759.6 (318.3 – 3303.3)      | 337.0 (191.7 – 601.9)     | 0.0004 <sup>a</sup>        |

|                         |                       |                       |                      |
|-------------------------|-----------------------|-----------------------|----------------------|
| IFN- $\alpha$ (pg/mL)   | 46.2 (31.5 – 99.8)    | 38.9 (31.5 – 49.3)    | 0.05                 |
| IFN- $\gamma$ (pg/mL)   | 24.0 (5.1 – 33.2)     | 28.1 (4.5 – 40.5)     | 0.7                  |
| IL-1-R $\alpha$ (ng/mL) | 1.1 (0.5 – 6.1)       | 0.5 (0.3 – 1.4)       | 0.0023 <sup>a</sup>  |
| IL-1 $\beta$ (pg/mL)    | 23.3 (17.1 – 37.6)    | 24.9 (15.1 – 38.7)    | 0.9                  |
| IL-1R1 (pg/mL)          | 372.6 (274.6 – 462.9) | 378.6 (261.5 – 450.8) | 0.8                  |
| IL-1R2 (ng/mL)          | 19.1 (10.1 – 55.3)    | 16.4 (11.8 – 25.5)    | 0.3                  |
| IL-2 (pg/mL)            | 6.0 (3.7 – 10.6)      | 7.6 (4.0 – 9.5)       | 0.8                  |
| IL-2R (ng/mL)           | 2.2 (1.0 – 3.4)       | 1.1 (0.8 – 2.0)       | 0.007 <sup>a</sup>   |
| IL-2RA (ng/mL)          | 6.0 (3.2 – 11.5)      | 3.5 (2.2 – 5.3)       | 0.002 <sup>a</sup>   |
| IL-4 (pg/mL)            | 8.2 (4.7 – 16.8)      | 10.1 (3.2 – 18.5)     | 0.5                  |
| IL-4R (ng/mL)           | 0.9 (0.5 – 1.4)       | 1.1 (0.5 – 1.4)       | 0.4                  |
| IL-5 (pg/mL)            | 4.2 (1.9 – 9.0)       | 2.4 (1.1 – 6.0)       | 0.02 <sup>a</sup>    |
| IL-6R (ng/mL)           | 20.4 (12.5 – 30.4)    | 20.5 (16.3 – 29.4)    | 0.5                  |
| IL-12 (pg/mL)           | 76.6 (52.1 – 141.4)   | 93.6 (49.2 – 148.6)   | 0.7                  |
| IL-13 (pg/mL)           | 10.5 (5.6 – 18.0)     | 6.0 (4.3 – 8.2)       | 0.001 <sup>a</sup>   |
| IL-15 (pg/mL)           | 148.1 (77.0 – 235.3)  | 112.7 (65.8 – 162.9)  | 0.09                 |
| IP-10 (pg/mL)           | 61.1 (28.5 – 172.9)   | 27.8 (17.5 – 69.6)    | 0.009 <sup>a</sup>   |
| MCP-1 (ng/mL)           | 1.7 (0.7 – 4.3)       | 0.5 (0.3 – 1.1)       | <0.0001 <sup>a</sup> |
| MIG (pg/mL)             | 111.7 (49.7 – 424.1)  | 50.8 (27.6 – 78.0)    | 0.0004 <sup>a</sup>  |
| MIP-1 $\alpha$ (pg/mL)  | 61.8 (44.3 – 109.0)   | 48.3 (40.1 – 63.1)    | 0.01 <sup>a</sup>    |
| MIP-1 $\beta$ (pg/mL)   | 110.0 (75.0 – 239.5)  | 66.2 (53.1 – 91.6)    | 0.0003 <sup>a</sup>  |
| sRAGE (pg/mL)           | 213.4 (169.9 – 317.4) | 212.3 (140.9 – 267.4) | 0.3                  |
| RANTES (ng/mL)          | 0.8 (0.4 – 1.4)       | 1.5 (0.9 – 2.2)       | 0.0004 <sup>a</sup>  |
| sgp130 (ng/mL)          | 188.8 (142.4 – 248.3) | 182.5 (145.8 – 225.0) | 0.6                  |
| TNF- $\alpha$ (pg/mL)   | 4.2 (3.2 – 5.9)       | 4.4 (2.4 – 7.2)       | 0.9                  |
| TNF-R1 (ng/mL)          | 5.1 (3.7 – 10.1)      | 2.9 (1.7 – 5.0)       | <0.0001 <sup>a</sup> |
| TNF-R2 (ng/mL)          | 38.7 (27.8 – 50.6)    | 16.1 (11.9 – 23.6)    | <0.0001 <sup>a</sup> |

ARDS = acute respiratory distress syndrome; Ang = angiotensin; CD = cluster of differentiation; CRP = C-reactive protein; EGF = epidermal growth factor; FGF = fibroblast growth factor; G-CSF = granulocyte colony-stimulating factor; GM-CSF = granulocyte-macrophage colony-stimulating factor; HGF = hepatocyte growth factor; ICAM = intracellular adhesion molecule; IFN = interferon; IL = interleukin; MCP = monocyte chemoattractant protein; MIG = monocyte induced by interferon  $\gamma$ ; MIP = macrophage inflammatory protein; -R = receptor; RANTES = regulated on activation, normal T cell expressed and secreted; sgp = serum glycoprotein; sFLT = soluble fms-like tyrosine kinase; sRAGE = soluble receptor for advanced glycation end-products; Tie-2 = tyrosine kinase with immunoglobulin-like loop epidermal growth factor homology domain 2; TNF- = tumor necrosis factor; VCAM = vascular adhesion molecule; VEGF = vascular endothelial growth factor; vWF = von Willebrand factor

Data are presented as median (interquartile range).

<sup>a</sup> P-value for univariate analysis comparing indirect and direct ARDS by Wilcoxon rank sum test. Significance is defined as  $p < 0.05$ .
