# Supplementary material for: Endothelial Biomarkers Are Associated With Indirect Lung Injury in Sepsis-Associated Pediatric Acute Respiratory Distress Syndrome
Source: PubMed Central journal article supplement — Crit Care Explor. 2020 Dec 4;2(12):e0295. doi: 10.1097/CCE.0000000000000295 (PMC7721219; doi:10.1097/cce.0000000000000295), 2020-12-04
Supplement: cc9-2-e0295-s004.pdf [file cc9-2-e0295-s004.pdf]

**Supplemental Table 2. Diagnostic Characteristics of Elastic Net Analysis**

|                                                  | <b>Statistic (% , 95% CI)</b>                                                 |
|--------------------------------------------------|-------------------------------------------------------------------------------|
| Optimal logistic model<br>logit {P(Direct ARDS)} | -0.005<br>- 0.77* Ang-2<br>- 0.81* I-L8<br>+ 0.74 * RANTES<br>- 0.60* TNF-RII |
| Area under the ROC curve                         | 84                                                                            |
| Optimal cut-off probability                      | 68                                                                            |
| Sensitivity                                      | 65 (51 – 78)                                                                  |
| Specificity                                      | 83 (69 – 92)                                                                  |
| Positive predictive value                        | 81 (66 – 91)                                                                  |
| Negative predictive value                        | 68 (54 – 80)                                                                  |

Ang = angiopoietin; IL = interleukin; RANTES = regulated on activation, normal T cell expressed and secreted; ROC = receiver-operating-characteristics; TNF-RII = tumor necrosis factor-receptor II
