# Supplementary figures and images for: Endothelial Biomarkers Are Associated With Indirect Lung Injury in Sepsis-Associated Pediatric Acute Respiratory Distress Syndrome
Source: PubMed Central journal article supplement — Crit Care Explor. 2020 Dec 4;2(12):e0295. doi: 10.1097/CCE.0000000000000295 (PMC7721219; doi:10.1097/cce.0000000000000295), 2020-12-04

# Supplemental Figure 1. Patient Flow Diagram

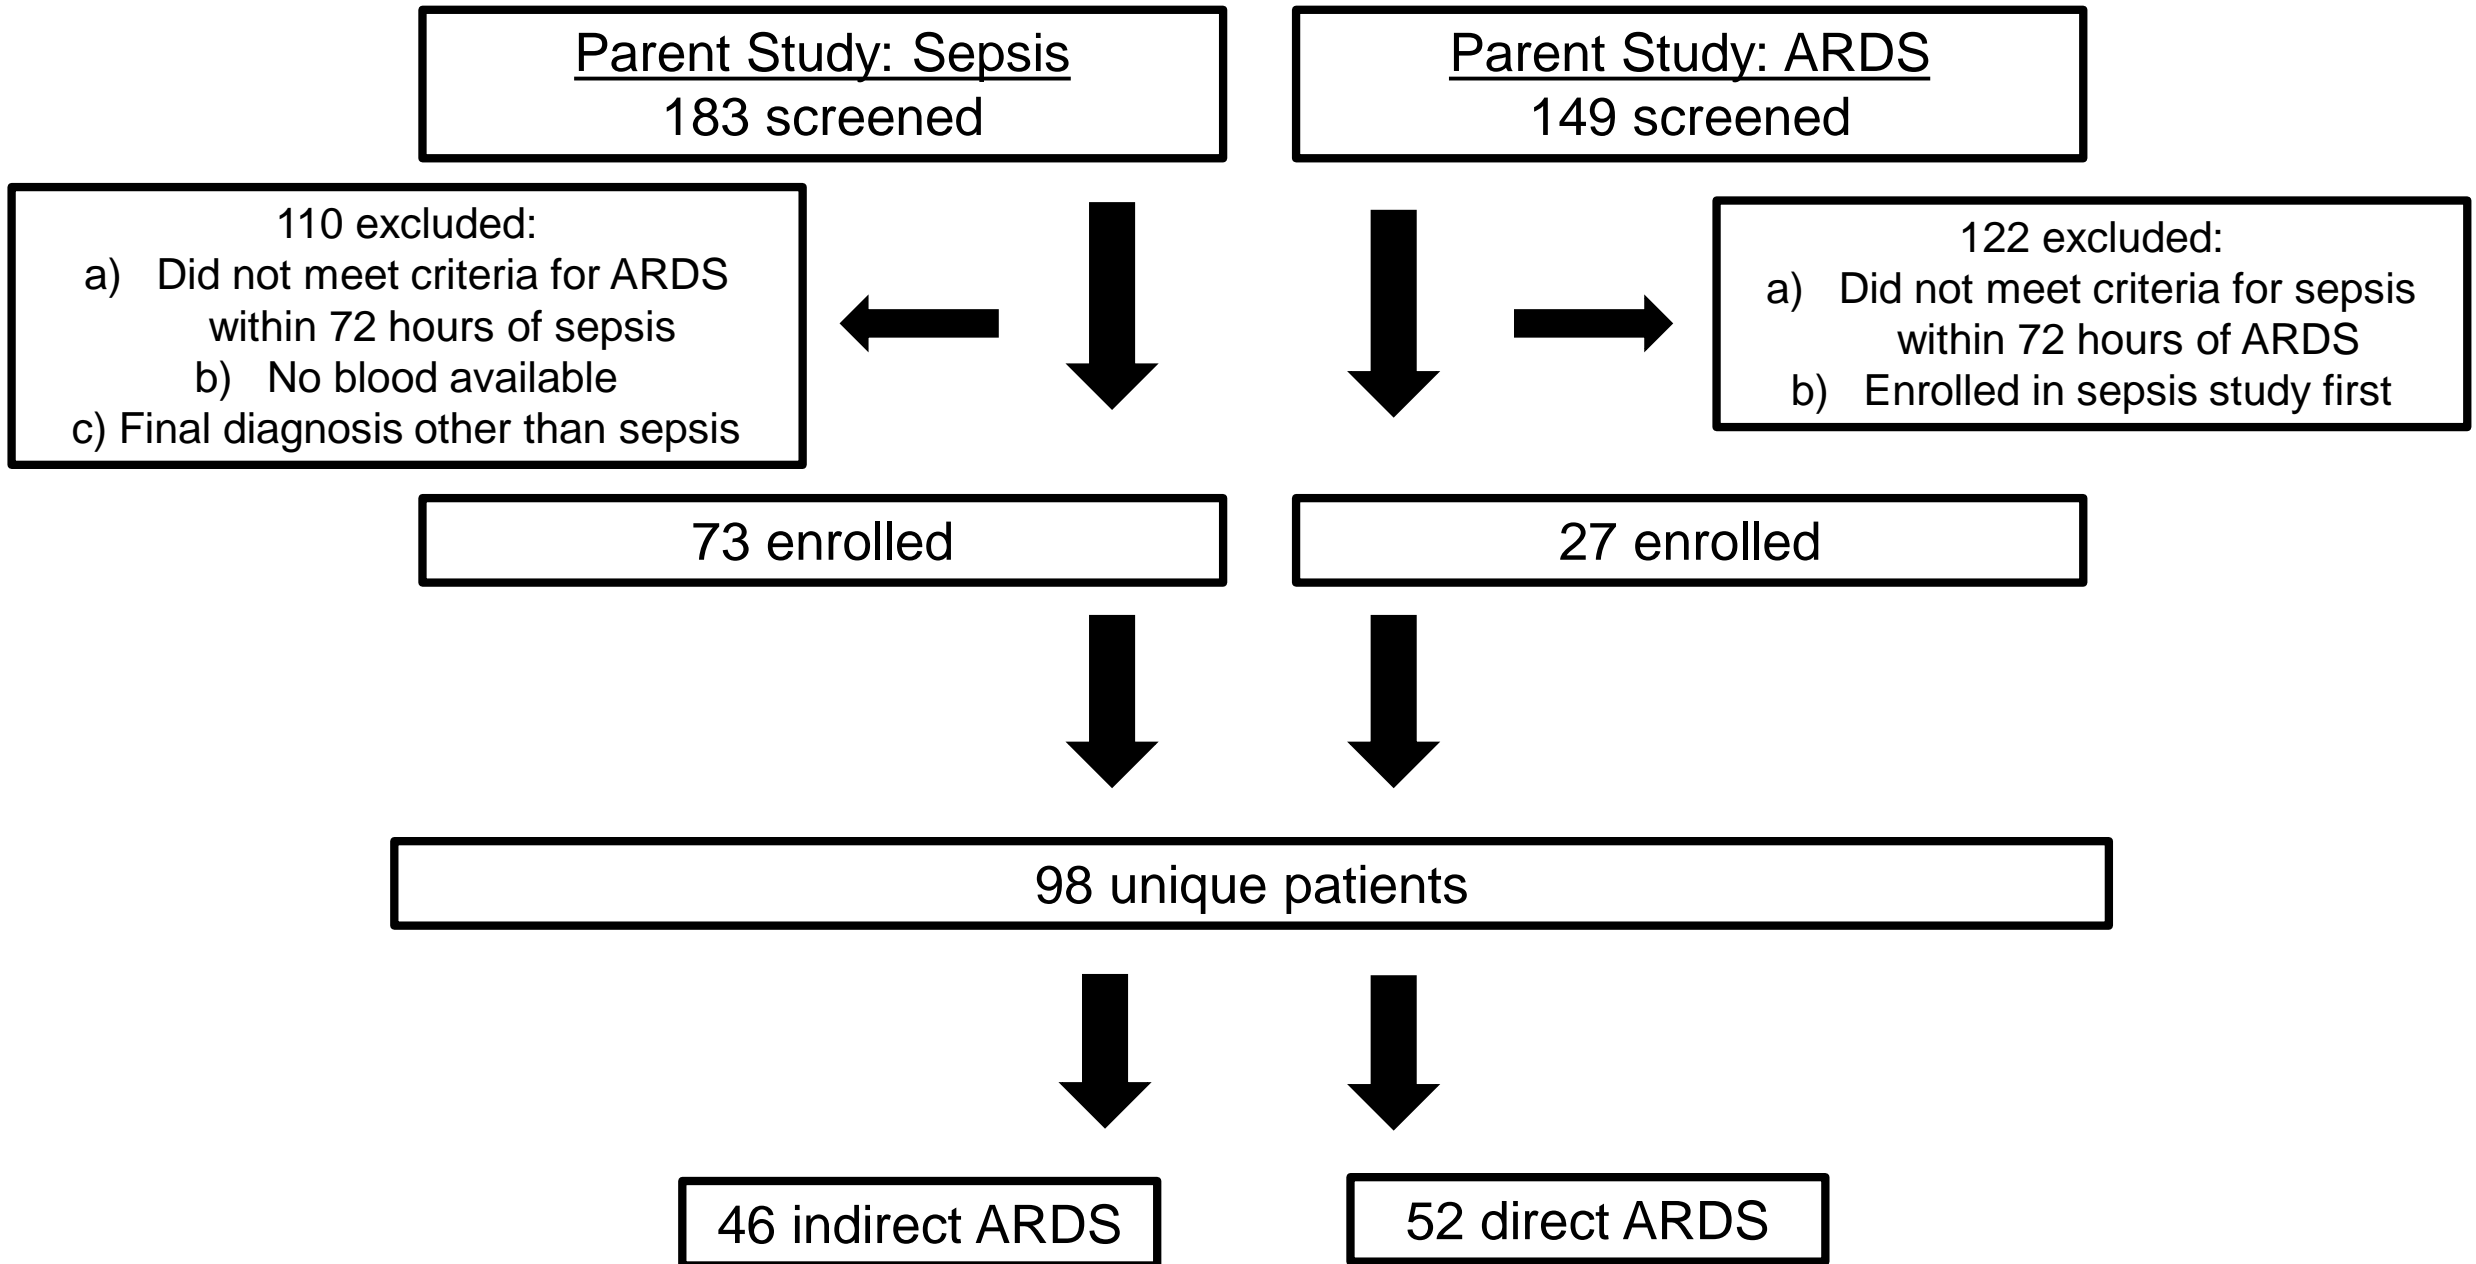

Supplement: cc9-2-e0295-s001.pdf [file cc9-2-e0295-s001.pdf]

Supplemental Figure 2. Decision Tree from CART Analysis Using Clinical Variables

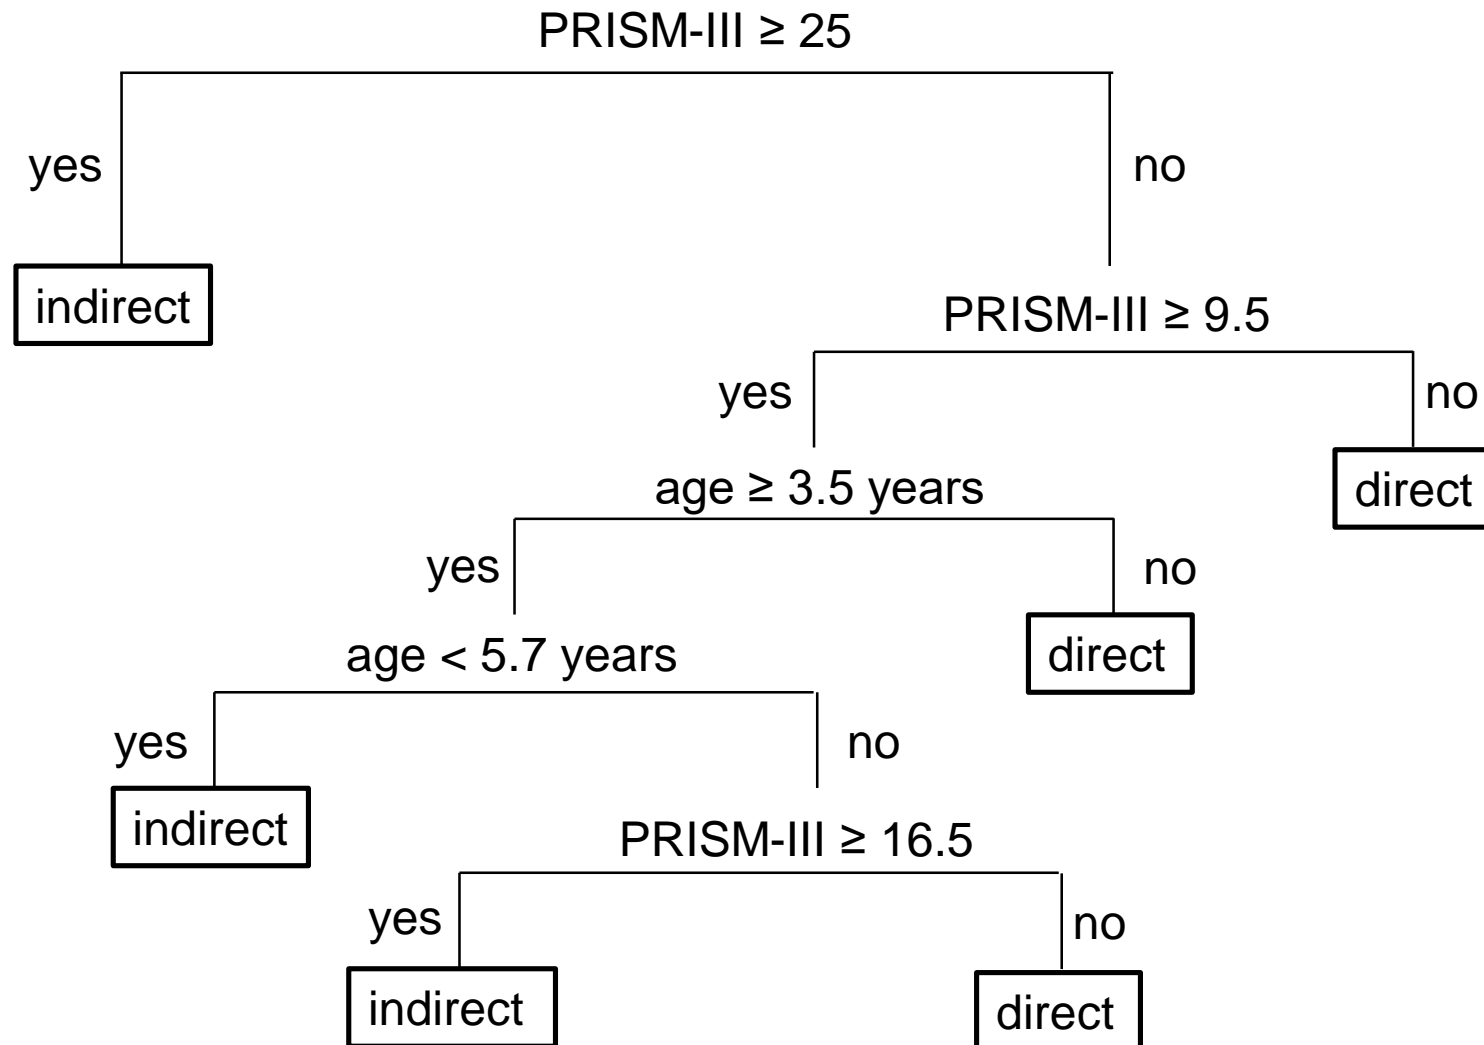

Supplement: cc9-2-e0295-s002.pdf [file cc9-2-e0295-s002.pdf]
